# Supplementary material for: Proposal for a new meteotsunami intensity index
Source: Copernicus journal article supplement (doi:10.5194/egusphere-2023-1147), 2023-06-01
Supplement: Supplementary file 1 [file egusphere-2023-1147-supplement.pdf]

Supplementary 1: S1

| UK           |                     |    |    |    |    |    |    |         |    |    |    |    |    |    |         |          |             |                |
|--------------|---------------------|----|----|----|----|----|----|---------|----|----|----|----|----|----|---------|----------|-------------|----------------|
| Event Date   | Event Lat/Long      | Wm | Cr | Fd | Ch | Ap | Ti | H Total | Pw | Sm | Sg | Se | Ai | Fi | R Total | Validity | Index Score | Location       |
| 1 Nov 1755   | 51.206328 -4.126537 | 2  |    |    | 1  |    | 2  | 1.6     | 5  | 4  | 2  | 2  | 3  | 1  | 2.8     | 2        | 2.2         | Ilfracombe     |
| 27 Feb 1756  | 51.206328 -4.126537 | 3  | 4  |    | 1  |    | 3  | 2.7     | 4  | 4  | 2  | 2  | 2  | 1  | 2.5     | 3        | 2.6         | Ilfracombe     |
| 31 May 1759  | 50.725152 -2.936509 |    |    |    | 1  |    |    | 1       |    | 3  | 2  | 3  |    | 1  | 2.2     | 1        | 1.6         | Lyme Regis     |
| 31 Mar 1761  | 50.118445 -5.539267 | 3  |    |    | 1  |    |    | 2       |    | 5  | 3  | 3  |    | 1  | 3       | 2        | 2.5         | Mounts Bay     |
| 18 Sept 1763 | 50.609378 -2.447155 | 4  |    |    | 1  |    |    | 2.5     |    | 4  | 4  | 2  |    | 1  | 2.7     | 3        | 2.6         | Weymouth       |
| 11 Feb 1764  | 51.453134 -2.600982 | 5  |    |    | 1  |    | 2  | 2.6     | 5  | 3  | 5  | 3  |    | 1  | 3.4     | 3        | 3           | Bristol        |
| 23 Dec 1791  | 50.332108 -4.634230 |    |    |    | 2  |    |    | 2       | 1  | 5  | 3  | 2  |    | 1  | 2.4     | 2        | 2.3         | Penzance       |
| 17 July 1793 | 50.388078 -4.187339 | 2  | 4  |    | 1  |    |    | 2.3     | 3  | 2  | 3  | 3  | 2  | 1  | 2.3     | 3        | 2.3         | Plymouth       |
| 18 Aug 1797  | 50.725152 -2.936509 | 4  | 5  |    | 2  |    | 4  | 3.6     | 5  | 3  | 2  | 3  | 4  | 1  | 3       | 1        | 3.3         | Lyme Regis     |
| 9 Aug 1802   | 50.388123 -4.187341 | 2  |    |    | 1  |    |    | 1.5     | 3  | 4  | 3  | 3  |    | 1  | 2.8     | 3        | 2.2         | Devon          |
| 10 Aug 1802  | 50.545898 -3.495653 | 2  |    |    | 1  |    |    | 1.5     | 3  | 2  | 1  | 3  |    | 1  | 2       | 3        | 1.8         | Teignmouth     |
| 30 Aug 1802  | 50.527805 -4.194967 | 3  |    |    | 1  |    |    | 2       |    | 2  | 5  | 2  |    | 1  | 2.5     | 2        | 2.3         | Jersey         |
| 31 May 1811  | 50.388078 -4.187339 | 4  |    | 2  | 1  |    |    | 2.3     | 3  | 2  | 3  | 3  | 3  | 1  | 2.5     | 3        | 2.4         | Plymouth       |
| 4 Mar 1818   | 50.781345 -0.918077 | 3  |    |    | 2  |    |    | 2.5     | 3  | 1  | 3  | 3  |    | 1  | 2.2     | 3        | 2.4         | Portsmouth     |
| 13 Sept 1821 | 50.388078 -4.187339 | 3  |    |    | 1  |    |    | 2       | 5  | 2  | 3  | 3  | 3  | 1  | 2.8     | 3        | 2.4         | Plymouth       |
| 13 July 1824 | 50.388078 -4.187339 | 2  | 5  |    | 1  |    |    | 2.8     | 1  | 2  | 3  | 3  | 2  | 1  | 2       | 3        | 2.4         | Plymouth       |
| 23 Nov 1824  | 50.388078 -4.187339 | 3  | 5  | 5  | 3  |    | 3  | 3.8     | 3  | 2  | 3  | 3  | 2  | 5  | 3       | 4        | 3.4         | Plymouth       |
| 5 July 1843  | 50.388078 -4.187339 | 3  |    |    | 1  |    |    | 2       | 3  | 2  | 3  | 3  |    | 1  | 2.4     | 3        | 2.2         | Plymouth       |
| 3 July 1845  | 50.609378 -2.447155 | 2  | 3  |    | 1  |    |    | 2       | 3  | 5  | 4  | 2  |    | 1  | 3       | 3        | 2.5         | Weymouth       |
| 5 July 1846  | 50.118445 -5.539267 | 2  |    |    | 1  |    |    | 1.5     | 1  | 5  | 3  | 3  |    | 1  | 2.6     | 2        | 2           | Penzance       |
| 1 Aug 1846   | 50.118445 -5.539267 | 2  |    |    | 1  |    |    | 1.5     | 1  | 5  | 3  | 3  |    | 1  | 2.6     | 3        | 2           | Penzance       |
| 23 May 1847  | 50.118445 -5.539267 | 3  | 4  | 4  | 1  |    | 2  | 2.8     | 3  | 5  | 3  | 3  | 2  | 1  | 2.8     | 4        | 2.8         | Penzance       |
| 7 July 1848  | 51.453134 -2.600982 | 3  |    |    | 1  |    |    | 2       | 1  | 3  | 5  | 3  |    | 1  | 2.6     | 2        | 2.3         | E/B channel    |
| 6 June 1855  | 50.118445 -5.539267 | 3  | 1  |    | 1  |    |    | 1.7     | 4  | 5  | 2  | 3  | 2  | 1  | 2.8     | 3        | 2.2         | Penzance       |
| 5 June 1858  | 50.814255 -0.371222 | 3  | 5  | 2  | 4  |    | 2  | 3.2     | 3  | 5  | 2  | 4  | 3  | 1  | 3       | 4        | 3.1         | E Channel      |
| 25 June 1859 | 50.118445 -5.539267 | 2  |    |    | 1  |    | 4  | 2.3     | 1  | 5  | 3  | 3  |    | 1  | 2.6     | 2        | 2.4         | Penzance       |
| 4 Oct 1859   | 50.305492 -3.963675 | 5  |    | 4  | 1  |    |    | 3.3     | 3  | 5  | 3  | 3  |    | 1  | 3       | 2        | 3.1         | Cornwall/Devon |
| Oct 1865     | 51.584903 -3.800578 |    |    |    | 1  |    |    | 1       |    | 2  | 5  | 2  |    | 1  | 2.5     | 1        | 1.8         | Port Talbot    |
| 23 Apr 1868  | 50.725152 -2.936509 | 5  |    |    | 1  |    |    | 3       |    | 4  | 2  | 3  |    | 1  | 2.5     | 2        | 2.7         | Lyme Regis     |
| 29 Sept 1869 | 50.305492 -3.963675 | 3  |    |    | 1  |    |    | 2       | 3  | 5  | 3  | 3  |    | 1  | 3       | 3        | 2.5         | Cornwall/Devon |
| 13 June 1881 | 60.154665 -1.146817 |    | 5  |    | 1  |    |    | 3       |    | 1  | 5  | 4  | 3  | 1  | 2.8     | 2        | 2.9         | Shetland       |
| 28 Aug 1883  | 50.388078 -4.187339 | 1  |    |    | 1  | 3  | 2  | 1.7     | 3  | 2  | 3  | 3  | 1  | 1  | 2.1     | 4        | 1.9         | Plymouth       |
| 17 Oct 1883  | 51.514348 -2.728113 | 3  | 5  | 5  | 4  |    | 5  | 4.4     | 3  | 3  | 5  | 5  | 4  | 1  | 3.5     | 4        | 3.9         | Severn Estuary |

|              |                      |  |   |  |   |   |   |   |   |   |     |   |   |   |   |   |   |   |   |     |     |   |     |     |             |               |
|--------------|----------------------|--|---|--|---|---|---|---|---|---|-----|---|---|---|---|---|---|---|---|-----|-----|---|-----|-----|-------------|---------------|
| 13 June 1886 | 57.479998 -4.226221  |  | 2 |  | 5 |   | 1 |   |   |   | 2.6 |   | 4 | 1 |   | 5 |   | 4 | 2 | 1   | 2.8 |   | 4   | 2.7 | Inverness   |               |
| 18 Aug 1892  | 50.3388123 -4.187341 |  | 4 |  | 5 |   | 1 |   |   |   | 3.3 |   |   | 3 | 3 | 3 | 3 | 3 | 3 | 1   | 2.6 | 3 | 3   | 3   | Yealm       |               |
| 16-Dec-10    | 51.206328 -4.126537  |  | 4 |  | 5 | 4 | 3 |   | 4 | 4 | 4   | 3 | 4 | 2 | 2 | 5 | 2 | 3 | 4 | 2   | 3   | 4 | 3.5 | 4   | 3.5         | Ilfracombe    |
| 26-Dec-12    | 50.690359 -1.089180  |  | 3 |  |   |   | 3 |   |   |   | 3.2 | 5 | 2 | 4 | 2 | 5 | 1 | 3 | 4 | 5   | 3.1 | 4 | 4   | 3.1 | IOW         |               |
| 20-Jul-29    | 51.082261 1.207840   |  | 4 |  | 5 |   | 5 | 2 | 2 | 2 | 3.6 | 4 | 4 | 4 | 2 | 4 | 5 | 3 | 4 | 5   | 3.8 | 4 | 4   | 3.7 | Folkstone   |               |
| 02-Aug-32    | 51.584858 -3.800576  |  | 5 |  |   |   | 1 |   |   |   | 3   |   | 1 | 2 | 5 | 5 | 3 | 2 | 5 | 5   | 3.2 | 2 | 3   | 3.1 | Aberavon    |               |
| 05-Aug-38    | 54.081644 -0.190007  |  | 3 |  | 4 |   | 1 |   | 2 | 2 | 2.5 | 3 | 3 | 5 | 2 | 3 | 1 | 3 | 1 | 1   | 2.8 | 4 | 4   | 2.6 | Bridlington |               |
| 04-Jul-39    | 50.262379 -4.783795  |  | 3 |  | 3 |   | 1 |   | 3 | 3 | 2.5 | 1 | 3 | 4 | 2 | 3 | 5 | 3 | 5 | 3   | 3   | 4 | 2.8 | 4   | 2.8         | Milford Haven |
| 03-Jul-46    | 50.118445 -5.539267  |  |   |  | 4 |   | 1 |   |   |   | 2.5 | 2 | 3 | 3 | 3 | 3 | 1 | 3 | 3 | 1   | 2.5 | 2 | 2   | 2.5 | Penzance    |               |
| 13-Jul-49    | 51.713077 -5.035976  |  |   |  | 5 |   | 1 |   |   |   | 3   | 1 | 2 | 5 | 3 | 2 | 1 | 2 | 2 | 1   | 2.3 | 2 | 2   | 2.6 | Mevagissey  |               |
| 06-Jul-57    | 50.690359 -1.089180  |  | 4 |  | 5 |   | 1 |   | 4 | 4 | 3.7 | 4 | 2 | 4 | 2 | 3 | 1 | 2 | 3 | 1   | 2.6 | 4 | 4   | 3.1 | Bembridge   |               |
| 31-Jul-66    | 51.039990 -4.237581  |  | 4 |  | 5 |   | 1 | 5 | 4 | 4 | 3.8 | 4 | 5 | 5 | 2 | 3 | 2 | 3 | 2 | 3.5 | 4   | 4 | 3.6 | 3.6 | Westward Ho |               |
| 01-Jul-68    | 50.823110 0.409003   |  |   |  |   |   | 1 | 5 |   |   | 3   |   | 4 | 4 | 2 |   | 1 | 2 | 1 | 2.8 | 2   | 2 | 2.9 | 2.9 | E Channel   |               |
| 13-Jul-79    | 51.453134 -2.600982  |  | 4 |  | 5 | 5 | 2 |   | 5 | 4 | 4.2 | 3 | 3 | 5 | 3 |   | 1 | 3 | 4 | 3   | 3   | 4 | 3.6 | 3.6 | Bristol     |               |
| 24-Oct-06    | 50.7053 -3.0719      |  | 2 |  |   | 3 | 2 |   | 4 | 4 | 2.7 | 3 | 5 | 3 | 4 | 2 | 1 | 3 | 3 | 3   | 3   | 3 | 2.8 | 3   | 2.8         | Seaton        |
| 01-Nov-06    | 51.9347 -1.2603      |  | 2 |  |   | 2 |   |   |   |   | 2   | 3 | 2 | 3 | 4 | 1 | 1 | 2 | 2 | 1   | 2.3 | 2 | 2   | 2.2 | 2.2         | Harwich       |
| 28-May-08    | 57.508229 -1.783477  |  | 2 |  |   |   | 1 | 2 |   |   | 1.7 | 1 | 3 | 4 | 2 |   | 1 | 2 | 4 | 1   | 2.2 | 4 | 2   | 2.2 | 2.2         | Peterhead     |
| 29-Jan-10    | 52.477364 1.750427   |  | 1 |  |   |   | 1 | 1 | 3 | 3 | 1.5 | 4 | 4 | 4 | 3 | 1 | 1 | 2 | 1 | 2.8 | 4   | 4 | 2.2 | 2.2 | 2.2         | Lowestoft     |
| 29-Aug-10    | 52.477364 1.750427   |  | 1 |  |   |   | 1 | 2 | 2 | 2 | 1.5 | 2 | 4 | 4 | 3 | 1 | 1 | 2 | 1 | 2.8 | 4   | 4 | 1.9 | 1.9 | 1.9         | Lowestoft     |
| 03-Feb-11    | 57.89666 -5.15483    |  | 2 |  |   |   | 2 | 1 | 3 | 3 | 2   | 2 | 4 | 4 | 2 | 1 | 1 | 2 | 1 | 2.7 | 4   | 4 | 2.3 | 2.3 | 2.3         | Ullapool      |
| 27-Jun-11    | 50.388078 -4.187339  |  | 2 |  | 5 |   | 2 | 5 | 2 | 2 | 3.2 | 3 | 2 | 3 | 3 | 1 | 1 | 2 | 1 | 2.2 | 4   | 4 | 2.7 | 2.7 | 2.7         | Devonport     |
| 22-Aug-11    | 50.791271 0.054164   |  | 2 |  |   | 1 | 1 |   | 3 | 3 | 1.6 | 1 | 4 | 4 | 3 | 1 | 1 | 2 | 1 | 2.3 | 4   | 4 | 2   | 2.3 | 2.3         | Newhaven      |
| 24-Nov-11    | 57.89666 -5.15483    |  | 1 |  |   |   | 1 | 1 | 4 | 4 | 1.8 | 1 | 4 | 4 | 2 | 1 | 1 | 2 | 1 | 2.2 | 4   | 4 | 2   | 2   | 2           | Ullapool      |
| 03-Jan-12    | 52.477364 1.750427   |  | 2 |  |   |   | 2 | 2 | 3 | 3 | 2.3 | 4 | 4 | 4 | 3 | 1 | 1 | 2 | 1 | 2.8 | 4   | 4 | 2.5 | 2.5 | 2.5         | Lowestoft     |
| 04-Feb-13    | 58.207722 -6.385266  |  | 2 |  |   |   | 1 |   | 2 | 2 | 1.7 | 3 | 2 | 4 | 2 | 1 | 1 | 2 | 1 | 2.1 | 4   | 4 | 1.9 | 1.9 | 1.9         | Stornoway     |
| 03-Aug-13    | 57.149851 -2.093760  |  | 1 |  |   |   | 1 | 2 | 2 | 2 | 1.5 | 3 | 1 | 4 | 2 | 1 | 1 | 2 | 1 | 2   | 4   | 4 | 1.8 | 1.8 | 1.8         | Aberdeen      |
| 28-Oct-13    | 50.388078 -4.187339  |  | 1 |  |   |   | 3 | 2 | 1 | 1 | 1.9 | 1 | 2 | 3 | 3 | 1 | 1 | 2 | 1 | 1.8 | 4   | 4 | 1.9 | 1.9 | 1.9         | Devonport     |
| 05-Dec-13    | 58.459144 -5.051109  |  | 2 |  |   |   | 3 | 3 | 5 | 5 | 3.3 | 4 | 1 | 4 | 2 | 5 | 1 | 2 | 5 | 2.8 | 4   | 4 | 3   | 3   | 3           | Kinlochbervie |
| 15-Dec-13    | 57.89666 -5.15483    |  | 1 |  |   |   | 2 | 1 | 4 | 4 | 2   | 4 | 4 | 4 | 2 | 1 | 1 | 2 | 1 | 2.7 | 4   | 4 | 2.3 | 2.3 | 2.3         | Ullapool      |
| 18-Dec-13    | 51.713077 -5.035976  |  | 2 |  |   |   | 2 | 4 | 4 | 4 | 3   | 4 | 3 | 4 | 2 | 1 | 1 | 2 | 1 | 2.5 | 4   | 4 | 2.7 | 2.7 | 2.7         | Milford Haven |
| 20-Dec-13    | 58.459144 -5.051109  |  | 1 |  |   |   | 2 | 3 | 4 | 4 | 2.5 | 4 | 1 | 4 | 2 | 4 | 1 | 2 | 4 | 2.6 | 4   | 4 | 2.5 | 2.5 | 2.5         | Kinlochbervie |
| 21-Dec-13    | 57.89666 -5.15483    |  | 1 |  |   |   | 1 | 1 | 4 | 4 | 1.8 | 5 | 4 | 4 | 2 | 4 | 1 | 3 | 4 | 3.3 | 4   | 4 | 2.6 | 2.6 | 2.6         | Ullapool      |
| 03-Jan-14    | 50.106745 -5.550280  |  | 2 |  |   |   | 3 | 3 | 4 | 4 | 3   | 5 | 3 | 4 | 2 | 3 | 1 | 2 | 3 | 3   | 4   | 4 | 3   | 3   | 3           | Newlyn        |
| 08-Feb-14    | 50.609378 -2.447155  |  | 1 |  |   |   | 1 | 2 | 2 | 2 | 1.5 | 4 | 4 | 4 | 2 | 2 | 1 | 2 | 1 | 2.8 | 4   | 4 | 2.1 | 2.1 | 2.1         | Weymouth      |
| 12-Feb-14    | 50.609378 -2.447155  |  | 1 |  |   |   | 2 | 1 | 4 | 4 | 2   | 2 | 4 | 4 | 2 | 2 | 1 | 2 | 1 | 2.5 | 4   | 4 | 2.2 | 2.2 | 2.2         | Weymouth      |
| 21-May-14    | 50.791271 0.054164   |  | 1 |  |   |   | 1 | 1 | 2 | 2 | 1.3 | 2 | 4 | 4 | 3 | 1 | 1 | 2 | 1 | 2.5 | 4   | 4 | 1.9 | 1.9 | 1.9         | Newhaven      |
| 22-May-14    | 60.154638 -1.146818  |  | 2 |  |   |   | 3 | 1 | 4 | 4 | 2.5 | 3 | 1 | 5 | 4 | 3 | 1 | 2 | 1 | 2.8 | 4   | 4 | 2.7 | 2.7 | 2.7         | Lerwick       |
| 01-Jan-15    | 57.89666 -5.15483    |  | 1 |  |   |   | 1 | 1 | 3 | 3 | 1.5 | 1 | 4 | 4 | 2 | 1 | 1 | 2 | 1 | 2.2 | 4   | 4 | 1.9 | 1.9 | 1.9         | Ullapool      |
| 08-Jan-15    | 57.89666 -5.15483    |  | 1 |  |   |   | 1 | 1 | 3 | 3 | 1.5 | 3 | 4 | 4 | 2 | 1 | 1 | 2 | 1 | 2.5 | 4   | 4 | 2   | 2   | 2           | Ullapool      |
| 01-Jul-15    | 56.963661 -2.209288  |  | 1 |  |   |   | 2 | 1 | 3 | 3 | 1.8 | 3 | 2 | 4 | 2 | 1 | 1 | 2 | 1 | 2.2 | 4   | 4 | 2   | 2   | 2           | Stonehaven    |
| 02-Jul-15    | 60.154638 -1.146818  |  | 2 |  |   |   | 3 | 4 | 2 | 2 | 2.8 | 2 | 1 | 5 | 4 | 1 | 1 | 2 | 1 | 2.3 | 4   | 4 | 2.6 | 2.6 | 2.6         | Lerwick       |
| 10-Dec-15    | 57.89666 -5.15483    |  | 1 |  |   |   | 2 | 1 | 4 | 4 | 2   | 3 | 4 | 4 | 2 | 1 | 1 | 2 | 1 | 2.5 | 4   | 4 | 2.3 | 2.3 | 2.3         | Ullapool      |
| 27-Jan-16    | 54.643368 -3.549368  |  | 2 |  |   |   | 1 | 4 | 4 | 4 | 2.8 | 5 | 2 | 5 | 2 | 1 | 1 | 2 | 1 | 2.7 | 4   | 4 | 2.7 | 2.7 | 2.7         | Workington    |
| 01-Feb-16    | 58.207722 -6.385266  |  | 1 |  |   |   | 3 |   | 3 | 3 | 1.5 | 4 | 2 | 4 | 2 | 1 | 1 | 2 | 1 | 2.3 | 4   | 4 | 2   | 2   | 2           | Stornoway     |
| 23-Jun-16    | 50.823110 0.409003   |  | 1 |  |   | 1 | 1 | 4 | 3 | 3 | 2   | 1 | 4 | 4 | 2 | 2 | 1 | 2 | 2 | 2.3 | 4   | 4 | 2.2 | 2.2 | 2.2         | E Channel     |
| 25-Aug-16    | 50.388078 -4.187339  |  | 2 |  | 5 |   | 1 | 1 | 4 | 4 | 2.6 | 2 | 2 | 3 | 3 | 3 | 1 | 2 | 3 | 2.3 | 4   | 4 | 2.5 | 2.5 | 2.5         | Devonport     |
| 16-Nov-16    | 58.459144 -5.051109  |  | 2 |  |   |   | 3 | 2 | 2 | 2 | 2.3 | 5 | 1 | 4 | 2 | 2 | 1 | 2 | 2 | 2.5 | 4   | 4 | 2.4 | 2.4 | 2.4         | Kinlochbervie |

|            |                     |   |   |   |    |    |       |     |   |   |   |   |   |   |     |   |     |               |
|------------|---------------------|---|---|---|----|----|-------|-----|---|---|---|---|---|---|-----|---|-----|---------------|
| 26-Dec-16  | 58.207722 -6.385266 | 2 |   |   | 1  |    | 3     | 2   | 3 | 2 | 4 | 2 | 1 | 1 | 2.2 | 4 | 2.1 | Stornoway     |
| 11-Jan-17  | 58.459144 -5.051109 | 1 |   |   | 2  | 2  | 4     | 2.3 | 3 | 1 | 4 | 2 | 2 | 1 | 2.1 | 4 | 2.2 | Kinlochbervie |
| 16-Oct-17  | 60.154638 -1.146818 | 2 |   |   | 3  | 3  | 4     | 3   | 4 | 1 | 5 | 4 | 2 | 1 | 2.8 | 4 | 2.9 | Lerwick       |
| 29-Jun-19  | 57.149851 -2.093760 | 2 |   |   | 2  | 3  | 2     | 2.2 | 4 | 1 | 4 | 2 | 1 | 1 | 2.2 | 4 | 2.2 | Aberdeen      |
| 08-Feb-20  | 58.510717 -6.254608 | 2 | 4 | 4 | 1  |    | 4     | 3   | 5 | 5 | 2 | 3 | 1 | 1 | 2.8 | 4 | 2.9 | Port Stoth    |
| 21-Aug-20  | 51.374160 -6.964043 | 2 |   |   | 3  | 2  | 4     | 3.2 | 2 | 5 | 4 | 3 | 1 | 1 | 2.6 | 4 | 2.9 | Perranporth   |
| 05-Jul-21  | 51.039990 -4.237581 | 2 | 4 | 4 | 1  | 1  | 3     | 2.5 | 5 | 5 | 5 | 2 | 1 | 1 | 3.2 | 4 | 2.8 | Westward Ho   |
| 09-Aug-21  | 50.427598 -3.683118 | 1 |   |   | 1  | 2  | 4     | 2   | 5 | 2 | 4 | 3 | 1 | 1 | 2.6 | 4 | 2.3 | Totnes        |
| 27-Sep-21  | 50.388078 -4.187339 | 2 |   |   | 1  | 4  | 2     | 2.3 | 1 | 2 | 4 | 3 | 1 | 1 | 2   | 4 | 2.2 | Plymouth      |
| 02-Oct-21  | 50.427598 -3.683118 | 1 |   |   | 1  | 2  | 3     | 1.3 | 5 | 2 | 4 | 3 | 1 | 1 | 2.6 | 4 | 2   | Totnes        |
| 20-Oct-21  | 50.388078 -4.187339 | 2 |   |   | 1  | 5  | 4     | 3   | 3 | 2 | 4 | 3 | 1 | 1 | 2.3 | 4 | 2.6 | Plymouth      |
| 27-Nov-21  | 50.427598 -3.683118 | 2 |   |   | 1  | 3  | 4     | 2.5 | 1 | 2 | 4 | 3 | 1 | 1 | 2   | 4 | 2.2 | Totnes        |
| 30-Dec-21  | 50.427598 -3.683118 | 2 |   |   | 1  | 2  | 2     | 1.8 | 1 | 2 | 4 | 3 | 1 | 1 | 2   | 4 | 1.9 | Totnes        |
| 16-Jan-21  | 51.603789 -6.610038 | 2 |   |   | 1  | 4  | 3     | 2.5 | 1 | 2 | 1 | 2 | 1 | 1 | 1.3 | 4 | 1.9 | Port Isaac    |
| 08-Feb-22  | 58.454733 -8.311040 | 2 | 4 | 4 | 1  |    | 4     | 3   | 5 | 5 | 3 | 2 | 1 | 1 | 2.8 | 4 | 2.9 | Dunnet        |
| 18-Jun-22  | 50.106745 -5.550280 | 2 | 4 |   | 1  | 5  | 2     | 2.8 | 5 | 3 | 4 | 2 | 2 | 1 | 2.8 | 4 | 2.8 | Newlyn        |
| 19-Jul-22  | 53.279049 -4.618126 | 2 | 4 | 2 | 2  | 5  | 3     | 2.6 | 5 | 5 | 4 | 3 | 1 | 2 | 3.3 | 4 | 2.9 | Anglesey      |
| 10-Sep-22  | 50.427598 -3.683118 | 1 |   |   |    | 1  | 2     | 1.3 | 1 | 2 | 4 | 3 |   | 1 | 2.2 | 4 | 1.7 | Totnes        |
| 01-Nov-22  | 50.388078 -4.187339 |   |   |   | 2  | 3  |       | 2.5 | 3 | 2 | 3 | 3 | 1 | 1 | 2.1 | 4 | 2.3 | Plymouth      |
| 08-Nov-22  | 51.603789 -6.610038 | 2 |   |   | 2  | 3  | 2     | 2.7 | 3 | 2 | 1 | 2 | 1 | 1 | 1.6 | 4 | 1.9 | Port Isaac    |
| 100 events |                     |   |   |   | HT | RT | INDEX | %   |   |   |   |   |   |   |     |   |     |               |
| L1         | LOW                 |   |   |   | 27 | 3  | 14    | 12  |   |   |   |   |   |   |     |   |     |               |
| L2         | MED                 |   |   |   | 47 | 74 | 69    | 69  |   |   |   |   |   |   |     |   |     |               |
| L3         | HIGH                |   |   |   | 23 | 23 | 16    | 16  |   |   |   |   |   |   |     |   |     |               |
| L4         | SEV                 |   |   |   | 3  | 0  | 0     | 0   |   |   |   |   |   |   |     |   |     |               |
| L5         | EXT                 |   |   |   | 0  | 0  | 0     | 0   |   |   |   |   |   |   |     |   |     |               |

Supplementary 2: S2

| Global      |    |    |    |    |    |    |         |     |    |    |    |    |    |         |          |             |                         |
|-------------|----|----|----|----|----|----|---------|-----|----|----|----|----|----|---------|----------|-------------|-------------------------|
| Event Date  | Wm | Cr | Fd | Ch | Ap | Ti | H Total | PW  | SM | SG | SE | Ai | Fi | R Total | Validity | Index Score | Location                |
| 30-Jan-1607 |    | 5  | 5  | 5  | 4  |    | 5       | 4.8 | 5  | 3  | 5  | 3  | 5  | 5       | 4        | 4.6         | Bristol, UK             |
| 21-Jun-78   |    | 5  | 5  | 5  | 2  |    | 4       | 4   | 3  | 2  | 4  | 3  | 5  | 3       | 4        | 3.8         | Vela Luka, Croatia      |
| 31-Mar-79   |    | 5  |    |    | 1  | 5  |         | 3.6 | 3  | 2  | 4  | 2  | 4  | 5       | 3        | 3.5         | Nagasaki, Japan         |
| 04-Jul-03   |    | 2  | 2  |    | 1  | 5  |         | 2.5 | 5  | 4  | 5  | 2  | 1  | 5       | 4        | 3.1         | Michigan, G. Lakes, USA |
| 15-Jun-06   |    | 5  | 4  | 3  | 2  | 5  |         | 3.8 | 4  | 2  | 5  | 3  | 3  | 1       | 4        | 3.4         | Ciutudella, Menorca     |
| 25-Jun-09   |    | 2  |    |    | 1  | 4  | 2       | 2.3 | 4  | 2  | 4  | 2  | 1  | 1       | 4        | 2.3         | Icheon, South Korea     |
| 29-Jul-10   |    | 2  | 3  | 1  | 1  | 3  |         | 2   | 3  | 1  | 3  | 2  | 1  | 1       | 4        | 1.9         | Pellinki, Finland       |

|           |   |   |   |   |   |   |     |   |   |   |   |   |   |     |   |     |                           |
|-----------|---|---|---|---|---|---|-----|---|---|---|---|---|---|-----|---|-----|---------------------------|
| 01-Nov-10 | 2 |   | 2 | 2 | 3 | 3 | 2.4 | 4 | 1 | 4 | 3 | 1 | 1 | 2.3 | 3 | 2.4 | Strait of Georgia, Canada |
| 07-Jan-13 | 2 |   |   | 1 | 5 |   | 2.7 | 3 | 2 | 4 | 3 | 2 | 1 | 2.5 | 3 | 2.6 | Fremantle, Australia      |
| 09-Feb-14 | 3 | 5 | 2 | 1 |   |   | 2.8 | 5 | 5 | 5 | 4 | 2 | 1 | 3.7 | 4 | 3.2 | Cassino Beach, Brazil     |
| 25-Jun-14 | 2 | 3 | 2 | 2 | 4 |   | 2.6 | 4 | 2 | 4 | 3 | 2 | 1 | 2.6 | 4 | 2.6 | Mazara del vallo, Sicily  |
| 08-Aug-15 | 3 |   | 4 | 2 |   |   | 3   | 3 | 5 | 4 | 1 | 4 | 3 | 3.3 | 3 | 3.1 | Bucalempu, Chile          |
| 15-May-16 | 2 |   |   | 1 | 2 | 2 | 1.8 | 3 | 2 | 4 | 2 | 2 | 1 | 2.3 | 3 | 2   | Colombo, Sri Lanka        |
| 19-Mar-17 | 4 |   | 2 | 2 | 4 |   | 3   | 3 | 5 | 5 | 3 | 4 | 5 | 4.2 | 4 | 3.6 | Dayyer, Persian Gulf      |
| 27-May-17 | 4 |   | 3 | 1 | 4 | 3 | 3   | 3 | 5 | 4 | 2 | 2 | 1 | 2.8 | 4 | 2.9 | Zandvoort, Netherlands    |
